# Supplementary material for: Comparative functional genomics analysis of bHLH gene family in rice, maize and wheat
Source: BMC Plant Biol. 2018 Nov 29;18:309. doi: 10.1186/s12870-018-1529-5 (PMC6267037; doi:10.1186/s12870-018-1529-5)
Supplement: Supplementary file 3 — Table S3. The distribution of TabHLHs on wheat chromosomes. (XLS 24 kb) [file 12870_2018_1529_MOESM3_ESM.xls]

## Sheet: Sheet1
Table S3. The distribution of TabHLHs on wheat chromosomes.
Chr.	Number of TabHLH genes	Count
1A	12	176
2A	28
3A	26
4A	20
5A	42
6A	24
7A	24
1B	13	193
2B	26
3B	34
4B	42
5B	34
6B	20
7B	24
1D	14	183
2D	28
3D	33
4D	35
5D	29
6D	20
7D	24
U	19	19
